# Supplementary material for: Untargeted Metabolomics Reveals a Multi-Faceted Resistance Response to Fusarium Head Blight Mediated by the Thinopyrum elongatum Fhb7E Locus Transferred via Chromosome Engineering into Wheat
Source: MDPI journal article supplement (doi:10.3390/cells12081113), 2023-04-08
Supplement: s1 [file s1]

# Supplementary material

## Untargeted metabolomics reveals a multi-faceted response to Fusarium Head Blight mediated by the *Thinopyrum elongatum Fhb7E* locus transferred via chromosome engineering into wheat

Giuseppina Fanelli, Ljiljana Kuzmanović, Gloria Giovenali, Silvio Tundo, Giulia Mandalà, Sara Rinalducci and Carla Ceoloni

**Table S1.** Segregation and  $\chi^2$  test (1:2:1 ratio of HOM+ : HET : HOM- genotypes) of BC<sub>3</sub>F<sub>2</sub> progenies of R69-9/R5 recombinant types (HOM+, and HET, plants homozygous and heterozygous, respectively, for the alien introgression; HOM-, plants lacking the alien introgression; *p*, probability; ns, non-significant).

| Progeny  | Seed No. | HOM+ | HET | HOM- | $\chi^2$ | <i>p</i>            |
|----------|----------|------|-----|------|----------|---------------------|
| V18x65-1 | 123      | 35   | 65  | 23   | 2.74     | 0.254 <sup>ns</sup> |
| V18x65-3 | 51       | 14   | 26  | 11   | 0.373    | 0.830 <sup>ns</sup> |
| V18x70-1 | 29       | 8    | 16  | 5    | 0.931    | 0.628 <sup>ns</sup> |
| V18x70-2 | 9        | 1    | 7   | 1    | 2.778    | 0.249 <sup>ns</sup> |
| V18x72-1 | 20       | 4    | 9   | 7    | 1.1      | 0.577 <sup>ns</sup> |
| Total    | 232      | 62   | 123 | 47   | 2.784    | 0.249 <sup>ns</sup> |

**Table S2.** List of resistance-related constitutive, RRC (a) and resistance-related induced, RRI (b) metabolites significantly more accumulated in rachises of HOM+ vs. HOM- genotype at 2 days post inoculation (FC > 1.5; FC = fold change).

|    | No. | Metabolite                                           | Chemical classification              | FC     |
|----|-----|------------------------------------------------------|--------------------------------------|--------|
| a) | 1   | Agmatine                                             | Amino acid and amino acid derivative | 96.381 |
|    | 2   | Gibberellin A24                                      | Terpenoids                           | 4.182  |
|    | 3   | Adifoline                                            | Alkaloids                            | 3.532  |
|    | 4   | 2S-Amino-tridecanoic acid                            | Lipid                                | 3.363  |
|    | 5   | 5--Phosphoribosyl-N-formylglycinamide                | Carbohydrate and derivatives         | 2.777  |
|    | 6   | Jamaicamide B                                        | Lipid                                | 2.660  |
|    | 7   | Glabric acid                                         | Terpenoids                           | 2.627  |
|    | 8   | 2-6-Diamino-7-hydroxy-azelaic acid                   | Amino acid and amino acid derivative | 2.612  |
|    | 9   | 10-Deoxysarpagine                                    | Other                                | 2.580  |
|    | 10  | DIBOA-glucoside                                      | Carbohydrate and derivatives         | 2.578  |
|    | 11  | Cimigenol                                            | Terpenoids                           | 2.512  |
|    | 12  | S-(Hydroxyphenylacetothiohydroximoyl)-L-cysteine     | Other                                | 2.451  |
|    | 13  | Taxifolin 3-O-acetate                                | Flavonoids                           | 2.344  |
|    | 14  | N6-N6-Dimethyladenosine                              | Carbohydrate and derivatives         | 2.320  |
|    | 15  | cyclo-Dopa 5-O-glucoside                             | Phenols                              | 2.297  |
|    | 16  | L-Citrulline                                         | Amino acid and amino acid derivative | 2.258  |
|    | 17  | Flavonol 3-O-beta-D-glucosyl-(1->2)-beta-D-glucoside | Flavonoids                           | 2.199  |

|    |                                                              |                                      |       |
|----|--------------------------------------------------------------|--------------------------------------|-------|
| 18 | Eupachloroxin                                                | Terpenoids                           | 2.195 |
| 19 | dCMP                                                         | Nucleotides                          | 2.127 |
| 20 | Peptidylglycine                                              | Other                                | 2.086 |
| 21 | Heliotrine                                                   | Alkaloids                            | 2.009 |
| 22 | N-Feruloylglycine                                            | Carboxylic Acids                     | 1.992 |
| 23 | Vitexin 2---O-beta-D-glucoside                               | Flavonoids                           | 1.977 |
| 24 | Lonchocarpenin                                               | Flavonoids                           | 1.918 |
| 25 | Fruticosonine                                                | Indoles                              | 1.866 |
| 26 | Fagaramide                                                   | Carboxylic Acids                     | 1.866 |
| 27 | Aromaticin                                                   | Terpenoids                           | 1.863 |
| 28 | N-(3-Oxohexanoyl)homoserine lactone                          | Lipid                                | 1.821 |
| 29 | 17-Hydroxylinolenic acid                                     | Lipid                                | 1.801 |
| 30 | N-Acetylneuraminate 9-phosphate                              | Other                                | 1.798 |
| 31 | Gradolide                                                    | Terpenoids                           | 1.793 |
| 32 | Deacetylvindoline                                            | Alkaloids                            | 1.778 |
| 33 | Stearidonic acid                                             | Lipid                                | 1.777 |
| 34 | Bruceine B                                                   | Terpenoids                           | 1.767 |
| 35 | Pyridine-2-3-dicarboxylate                                   | Heterocyclic Compounds               | 1.766 |
| 36 | O-Acetylcypholophine                                         | Other                                | 1.714 |
| 37 | Linalyl acetate                                              | Terpenoids                           | 1.683 |
| 38 | Indolelactate                                                | Indoles                              | 1.660 |
| 39 | Auriculine                                                   | Carbohydrate and derivatives         | 1.652 |
| 40 | Paeonoside                                                   | Carbohydrate and derivatives         | 1.635 |
| 41 | (9Z-12Z-15Z)-(7S-8S)-Dihydroxyoctadeca-9-12-15-trienoic acid | Lipid                                | 1.621 |
| 42 | 6-(alpha-D-Glucosaminy)-1D-myo-inositol                      | Carbohydrate and derivatives         | 1.620 |
| 43 | Astrocasin                                                   | Other                                | 1.619 |
| 44 | Xanthyletin                                                  | Heterocyclic Compounds               | 1.616 |
| 45 | Spermine                                                     | Amines                               | 1.614 |
| 46 | (S)-2-Hydroxystearate                                        | Lipid                                | 1.606 |
| 47 | sn-glycero-3-Phosphocholine                                  | Lipid                                | 1.595 |
| 48 | (-)-Phaseollin                                               | Flavonoids                           | 1.591 |
| 49 | Abyssinone I                                                 | Flavonoids                           | 1.591 |
| 50 | DIBOA                                                        | Heterocyclic Compounds               | 1.587 |
| 51 | 2-Methyl-3-hydroxy-5-formylpyridine-4-carboxylate            | Other                                | 1.587 |
| 52 | Falaconitine                                                 | Alkaloids                            | 1.584 |
| 53 | Salicin 6-phosphate                                          | Glycosides                           | 1.584 |
| 54 | Porphobilinogen                                              | Other                                | 1.565 |
| 55 | Oleoylglycerone phosphate                                    | Carbohydrate and derivatives         | 1.559 |
| 56 | 2-C-Methyl-D-erythritol 4-phosphate                          | Carbohydrate and derivatives         | 1.548 |
| 57 | N-Methylethanolamine phosphate                               | Other                                | 1.546 |
| 58 | Amylopectin                                                  | Polymers                             | 1.546 |
| 59 | N2-Succinyl-L-arginine                                       | Amino acid and amino acid derivative | 1.527 |
| 60 | Asclepin                                                     | Carbohydrate and derivatives         | 1.506 |
| 61 | Glycyphyllin                                                 | Carbohydrate and derivatives         | 1.504 |

|           |    |                                                                |                              |       |
|-----------|----|----------------------------------------------------------------|------------------------------|-------|
| <b>b)</b> | 1  | Flavonol 3-O-D-xylosylglycoside                                | Flavonoids                   | 3.085 |
|           | 2  | Heliamine                                                      | Alkaloids                    | 2.807 |
|           | 3  | Pyridoxine phosphate                                           | Other                        | 2.593 |
|           | 4  | 5-Hydroxymethyldeoxycytidylate                                 | Carbohydrate and derivatives | 2.588 |
|           | 5  | Leucyl-leucine                                                 | Peptides                     | 2.366 |
|           | 6  | Glutathione                                                    | Peptides                     | 2.066 |
|           | 7  | 5-Hydroxyindoleacetyl glycine                                  | Other                        | 1.970 |
|           | 8  | Abscisic acid glucose ester                                    | Carboxylic Acids             | 1.957 |
|           | 9  | 2-N-6-N-Bis(2-3-dihydroxy-N-benzoyl)-L-serine                  | Other                        | 1.750 |
|           | 10 | 1-(5-Phosphoribosyl)-4-(N-succinocarboxamide)-5-aminoimidazole | Other                        | 1.713 |
|           | 11 | 1-Deoxy-D-altro-heptulose 7-phosphate                          | Carbohydrate and derivatives | 1.694 |

|    |                                                              |                                      |       |
|----|--------------------------------------------------------------|--------------------------------------|-------|
| 12 | gamma-L-Glutamylputrescine                                   | Amino acid and amino acid derivative | 1.691 |
| 13 | Actinamine                                                   | Other                                | 1.599 |
| 14 | N-Acetyl-beta-D-glucosaminyl-1-3-N-acetyl-D-galactosaminyl-R | Carbohydrate and derivatives         | 1.564 |
| 15 | GMP                                                          | Nucleotides                          | 1.530 |
| 16 | Apigenin 7-4--dimethyl ether                                 | Flavonoids                           | 1.526 |

**Table S3.** List of resistance-related constitutive, RRC (a) and resistance-related induced, RRI (b) metabolites significantly more accumulated in rachises of HOM+ vs. HOM- genotype at 4 days post inoculation (FC > 1.5; FC = fold change).

|           | No. | Metabolite                                              | Chemical classification              | FC     |
|-----------|-----|---------------------------------------------------------|--------------------------------------|--------|
| <b>a)</b> | 1   | Agmatine                                                | Amino acid related compounds         | 57.756 |
|           | 2   | N6-Alkylaminopurine-9-beta-D-glucoside                  | Others                               | 3.416  |
|           | 3   | N-Hydroxyl-tryptamine                                   | Indoles                              | 3.254  |
|           | 4   | Acetylarginine                                          | Guanidines                           | 2.992  |
|           | 5   | Abscissic acid glucose ester                            | Carboxylic Acids                     | 2.932  |
|           | 6   | Deoxyuridine                                            | Nucleosides                          | 2.676  |
|           | 7   | N-Heptanoylhomoserine lactone                           | Carboxylic acid                      | 2.571  |
|           | 8   | 3--4--5-6-Tetrahydroxy-3-7-dimethoxyflavone             | Flavonoids                           | 2.247  |
|           | 9   | D-glucosamine-6-phosphate                               | Carbohydrates                        | 2.042  |
|           | 10  | S-Decyl GSH                                             | Peptides                             | 2.041  |
|           | 11  | Glutathionylspermidine                                  | Amines                               | 2.000  |
|           | 12  | 5--Phosphoribosylglycinamide                            | Secondary metabolites                | 1.972  |
|           | 13  | xanthine                                                | Alkaloids                            | 1.911  |
|           | 14  | Flavonol 3-O-beta-D-glucosyl-(1->2)-beta-D-glucoside    | Flavonoids                           | 1.833  |
|           | 15  | 5-Hydroxyindoleacetyl glycine                           | Others                               | 1.825  |
|           | 16  | Hydroxyveronolide                                       | Terpenoids                           | 1.791  |
|           | 17  | 9-Methylthiononanaldoxime                               | Others                               | 1.766  |
|           | 18  | 1-Guanidino-1-deoxy-scyllo-inositol 4-phosphate         | Organic hydroxy compound             | 1.751  |
|           | 19  | leucine/isoleucine                                      | Amino acid and amino acid derivative | 1.723  |
|           | 20  | Flindersiamine                                          | Alkaloids                            | 1.701  |
|           | 21  | Hexahomomethionine                                      | Amino acid and amino acid derivative | 1.659  |
|           | 22  | Erysonine                                               | Alkaloids                            | 1.625  |
|           | 23  | N-Nitrosodiphenylamine                                  | Others                               | 1.624  |
|           | 24  | Fastigilin C                                            | Terpenoids                           | 1.610  |
|           | 25  | Deoxyinosine                                            | Nucleosides                          | 1.598  |
|           | 26  | N-Dimethyl-2-aminoethylphosphonate                      | Others                               | 1.598  |
|           | 27  | Robinosiose                                             | Carbohydrates                        | 1.591  |
|           | 28  | Gibberellin A24                                         | Terpenoids                           | 1.564  |
|           | 29  | Indoleamine                                             | Indoles                              | 1.556  |
| <b>b)</b> | 1   | N1-(5-Phospho-alpha-D-ribose)-5-6-dimethylbenzimidazole | Carbohydrate and derivatives         | 112.21 |
|           | 2   | shikimate                                               | Carboxylic acid                      | 58.451 |
|           | 3   | L-2-Methyltryptophan                                    | Amino acid and amino acid derivative | 51.389 |
|           | 4   | N-Caffeoylputrescine                                    | Phenylpropanoid                      | 35.944 |
|           | 5   | 6-Oxocheilerythrine                                     | Heteromonocyclic compound            | 12.940 |
|           | 6   | 7-Methylxanthosine                                      | Alkaloids                            | 11.076 |
|           | 7   | Protein N6-methyl-L-lysine                              | Amino acid and amino acid derivative | 10.388 |
|           | 8   | Leucyl-leucyl-norleucine                                | Peptides                             | 8.780  |
|           | 9   | 5-o-Feruloylquinic acid                                 | Phenylpropanoid                      | 7.406  |
|           | 10  | S-Hexyl-glutathione                                     | Peptides                             | 7.255  |
|           | 11  | 1-Oleoylglycerophosphocholine                           | Lipid                                | 7.255  |

|    |                                                                    |                                      |       |
|----|--------------------------------------------------------------------|--------------------------------------|-------|
| 12 | Acremoauxin A                                                      | Indoles                              | 6.910 |
| 13 | D-Glucosaminide                                                    | Other                                | 6.652 |
| 14 | 2-Carboxy-D-arabinitol                                             | Carbohydrate and derivatives         | 6.434 |
| 15 | 4-Prenylresveratrol                                                | Phenylpropanoid                      | 6.375 |
| 16 | Acetylblastidin S                                                  | Heteromonocyclic compound            | 6.231 |
| 17 | Caffeoquinone                                                      | Carboxylic acid                      | 6.228 |
| 18 | Oxaloglutarate                                                     | Carboxylic acid                      | 6.158 |
| 19 | D-Glucono-1-5-lactone 6-phosphate                                  | Other                                | 6.016 |
| 20 | 2-Demethylmenaquinone                                              | Other                                | 5.845 |
| 21 | N-Feruloylglycine                                                  | Carboxylic acid                      | 5.795 |
| 22 | N <sup>2</sup> -(D-1-Carboxyethyl)-L-lysine                        | Amino acid and amino acid derivative | 5.790 |
| 23 | 1-Octen-3-ol-3-o-beta-D-xylopyranosyl(1->6)-beta-D-glucopyranoside | Carbohydrate and derivatives         | 5.763 |
| 24 | N(6)-[(Indol-3-yl)acetyl]-L-lysine                                 | Heterocyclic Compounds               | 5.507 |
| 25 | N-Formyl-D-kynurenine                                              | Amino acid and amino acid derivative | 5.492 |
| 26 | N-Acyl-L-arginine                                                  | Amino acid and amino acid derivative | 5.226 |
| 27 | S-(Hydroxymethyl)glutathione                                       | Peptides                             | 5.146 |
| 28 | N-Acetyl-L-glutamate 5-phosphate                                   | Amino acid and amino acid derivative | 5.090 |
| 29 | Prephenate                                                         | Carboxylic acid                      | 4.828 |
| 30 | Cellotetraose                                                      | Carbohydrate and derivatives         | 4.550 |
| 31 | Brusatol                                                           | Terpenoids                           | 4.437 |
| 32 | 6-Acetyl-beta-D-galactoside                                        | Carbohydrate and derivatives         | 4.401 |
| 33 | 2-(5-Methylthio)pentylmalic acid                                   | Carboxylic acid                      | 4.391 |
| 34 | Callichiline                                                       | Heterocyclic Compounds               | 4.230 |
| 35 | methylquercetin                                                    | Flavonoids                           | 4.215 |
| 36 | Gibberellin A12 aldehyde                                           | Terpenoids                           | 4.183 |
| 37 | Gallate                                                            | Phenols                              | 3.997 |
| 38 | 2-Hydroxyethylphosphonate                                          | Other                                | 3.996 |
| 39 | Gibberellin A5                                                     | Terpenoids                           | 3.989 |
| 40 | Glutathione                                                        | Peptides                             | 3.960 |
| 41 | 5-Methylcytosine                                                   | Heterocyclic Compounds               | 3.936 |
| 42 | Geranyl diphosphate                                                | Terpenoids                           | 3.756 |
| 43 | Cysteinyldopa                                                      | Amines                               | 3.695 |
| 44 | Ammoresinol                                                        | Terpenoids                           | 3.598 |
| 45 | DIBOA                                                              | Heterocyclic Compounds               | 3.497 |
| 46 | Caribine                                                           | Alkaloids                            | 3.490 |
| 47 | NAC                                                                | Carboxylic acid                      | 3.418 |
| 48 | N-Acetyl-4-O-acetylneuraminate                                     | Carboxylic acid                      | 3.417 |
| 49 | Isochamaejasmin                                                    | Flavonoids                           | 3.351 |
| 50 | Paeonoside                                                         | Carbohydrate and derivatives         | 3.243 |
| 51 | Pipecolic acid                                                     | Carboxylic acid                      | 3.145 |
| 52 | Sinapyl alcohol                                                    | Phenylpropanoid                      | 3.129 |
| 53 | glucose-6-phosphate                                                | Carbohydrate and derivatives         | 3.114 |
| 54 | Hydroxymethylphosphonate                                           | Other                                | 3.091 |
| 55 | Geranyl-hydroxybenzoate                                            | Terpenoids                           | 3.072 |
| 56 | 1-Alkyl-2-acylglycerophosphoethanolamine                           | Other                                | 2.988 |
| 57 | Thiamine aldehyde                                                  | Vitamins                             | 2.977 |
| 58 | 2-3-Dehydro-gibberellin A9                                         | Terpenoids                           | 2.956 |
| 59 | Acetylcysteine                                                     | Carboxylic acid                      | 2.929 |
| 60 | Acronycidine                                                       | Alkaloids                            | 2.884 |
| 61 | Menaquinone                                                        | Vitamins                             | 2.862 |
| 62 | TRBOA                                                              | Heterocyclic Compounds               | 2.845 |
| 63 | 1-Hydroxyalkyl-sn-glycerol                                         | Other                                | 2.838 |
| 64 | 6-Methoxytaxifolin                                                 | Flavonoids                           | 2.835 |
| 65 | Soraphen O                                                         | Other                                | 2.824 |
| 66 | 2-Methylpropanoyl phosphate                                        | Other                                | 2.816 |
| 67 | 8-Epideoxyloganin                                                  | Terpenoids                           | 2.804 |
| 68 | S-Octyl GSH                                                        | Peptides                             | 2.780 |

|     |                                                                |                                      |       |
|-----|----------------------------------------------------------------|--------------------------------------|-------|
| 69  | N(alpha)-t-Butoxycarbonyl-L-leucine                            | Amino acid and amino acid derivative | 2.773 |
| 70  | 8-Methylthiooctyl glucosinolate                                | Other                                | 2.712 |
| 71  | Chitobiose                                                     | Carbohydrate and derivatives         | 2.697 |
| 72  | N-Acetyldemethylphosphinothricin tripeptide                    | Peptides                             | 2.620 |
| 73  | Indolepyruvate                                                 | Indoles                              | 2.580 |
| 74  | CMP-N-glycolylneuraminate                                      | Other                                | 2.566 |
| 75  | Altersolanol A                                                 | Phenols                              | 2.549 |
| 76  | 5-O-Caffeoylshikimic acid                                      | Phenylpropanoid                      | 2.549 |
| 77  | Orotate                                                        | Carboxylic acid                      | 2.548 |
| 78  | Quercetin 3-O-(6-O-malonyl-beta-D-glucoside)                   | Flavonoids                           | 2.450 |
| 79  | 3-Sulfinol-L-alanine                                           | Amino acid and amino acid derivative | 2.423 |
| 80  | Citrinin                                                       | Mycotoxins                           | 2.421 |
| 81  | (3S,4S)-3-Hydroxytetradecane-1,3,4-tricarboxylate              | Lipid                                | 2.412 |
| 82  | N-Monomethyl-2-aminoethylphosphonate                           | Other                                | 2.412 |
| 83  | Anthocyanidin                                                  | Flavonoids                           | 2.402 |
| 84  | Inosine                                                        | Nucleotides and derivatives          | 2.341 |
| 85  | 1-(5-Phosphoribosyl)-4-(N-succinocarboxamide)-5-aminoimidazole | Other                                | 2.328 |
| 86  | 1-Organyl-2-lyso-sn-glycero-3-phosphocholine                   | Lipid                                | 2.319 |
| 87  | Glutathione disulfide                                          | Peptides                             | 2.285 |
| 88  | pyridoxine                                                     | Vitamins                             | 2.265 |
| 89  | N-Acetyl-L-citrulline                                          | Carboxylic acid                      | 2.220 |
| 90  | 3--5--Cyclic IMP                                               | Nucleotides and derivatives          | 2.216 |
| 91  | 1-O-Feruloyl-beta-D-glucose                                    | Phenols                              | 2.211 |
| 92  | 5-Hydroxyconiferaldehyde                                       | Phenylpropanoid                      | 2.193 |
| 93  | N-(4-Guanidinobutyl)-4-hydroxycinnamide                        | Phenols                              | 2.185 |
| 94  | 7-Methylthioheptanaloxime                                      | Other                                | 2.178 |
| 95  | Fruticosonine                                                  | Alkaloids                            | 2.176 |
| 96  | Feruloylputrescine                                             | Carboxylic acid                      | 2.160 |
| 97  | S-Methyl-1-thio-D-glycerate                                    | Other                                | 2.156 |
| 98  | 2,6-Dihydroxyanthraquinone                                     | Phenols                              | 2.135 |
| 99  | Hordatine A                                                    | Phenols                              | 2.129 |
| 100 | Gnididilatin                                                   | Terpenoids                           | 2.128 |
| 101 | 5-Hydroxypentanoate                                            | Carboxylic acid                      | 2.101 |
| 102 | Allantoin                                                      | Heterocyclic Compounds               | 2.088 |
| 103 | trans-2,3-Dihydroxycinnamate                                   | Carboxylic acid                      | 2.082 |
| 104 | L-Homocysteic acid                                             | Amino acid and amino acid derivative | 2.043 |
| 105 | N-Acetyllactosamine                                            | Carbohydrate and derivatives         | 2.025 |
| 106 | Pyridoxal phosphate                                            | Vitamins                             | 2.025 |
| 107 | Cucurbitic acid                                                | Lipid                                | 2.008 |
| 108 | alpha-ketoglutarate                                            | Carboxylic acid                      | 1.986 |
| 109 | Adenosine                                                      | Nucleotides and derivatives          | 1.981 |
| 110 | Caffeate                                                       | Phenylpropanoid                      | 1.967 |
| 111 | (R)-Mevalonate                                                 | Carboxylic acid                      | 1.917 |
| 112 | lupinosoflavone G                                              | Flavonoids                           | 1.868 |
| 113 | D-Erythritol 4-phosphate                                       | Carbohydrate and derivatives         | 1.858 |
| 114 | 10-Deoxygeniposidic acid                                       | Terpenoids                           | 1.850 |
| 115 | Chorismate                                                     | Carboxylic Acids                     | 1.828 |
| 116 | Caracurine V                                                   | Alkaloids                            | 1.819 |
| 117 | 5-Hydroxykynurenine                                            | Amino acid and amino acid derivative | 1.760 |
| 118 | 2-Oxoglutarate                                                 | Carboxylic acid                      | 1.760 |
| 119 | Cinegalline                                                    | Alkaloids                            | 1.748 |
| 120 | N2-Succinyl-L-arginine                                         | Carboxylic acid                      | 1.737 |
| 121 | N-Acetyl-D-quinovosamine                                       | Carbohydrate and derivatives         | 1.733 |
| 122 | Phosphorylcholine                                              | Lipid                                | 1.732 |
| 123 | 10-Deoxysarpagine                                              | Other                                | 1.725 |
| 124 | L-Serine                                                       | Amino acid and amino acid derivative | 1.710 |
| 125 | (9R,10R)-Dihydroxyoctadecanoic acid                            | Lipid                                | 1.705 |

|     |                                           |                                      |       |
|-----|-------------------------------------------|--------------------------------------|-------|
| 126 | N-Succinyl-L-2-6-diaminoheptanedioate     | Carboxylic acid                      | 1.681 |
| 127 | 6-8-Diprenylnaringenin                    | Flavonoids                           | 1.671 |
| 128 | Berbamunine                               | Alkaloids                            | 1.633 |
| 129 | Diferulic acid                            | Phenylpropanoid                      | 1.621 |
| 130 | Xylose                                    | Carbohydrate and derivatives         | 1.620 |
| 131 | Pantothenol                               | Vitamins                             | 1.602 |
| 132 | 2(alpha-D-Mannosyl)-D-glycerate           | Carbohydrate and derivatives         | 1.599 |
| 133 | Flavonol 3-O-D-xylosylglucoside           | Flavonoids                           | 1.596 |
| 134 | Leucyl-leucine                            | Peptides                             | 1.578 |
| 135 | Succinylproline                           | Carboxylic acid                      | 1.567 |
| 136 | Lipoate                                   | Lipid                                | 1.552 |
| 137 | L-Histidinol phosphate                    | Other                                | 1.547 |
| 138 | (R)-3-((R)-3-Hydroxybutanoyloxy)butanoate | Carboxylic acid                      | 1.532 |
| 139 | N6-Methyl-L-lysine                        | Amino acid and amino acid derivative | 1.529 |
| 140 | Pyridoxine phosphate                      | Vitamins                             | 1.529 |
| 141 | 6-Dehydro-6-oxoparomamine                 | Other                                | 1.517 |
| 142 | 2-Deoxymugineic acid                      | Carboxylic acid                      | 1.514 |
| 143 | N-Adenylyl-L-phenylalanine                | Amino acid and amino acid derivative | 1.510 |

**Figure S1.** Metabolomics Pathway Analysis (MetPA) of rachis tissue from the resistant *Fhb7E* carrier (HOM+) and susceptible non-carrier (HOM-) lines at 4 dpi after water (*mock*) or *Fg* treatment: (a) *Fg*-HOM+ vs. *mock*-HOM+, and (b) *Fg*-HOM- vs. *mock*-HOM- comparisons. All the matched pathways are displayed as circles. The colour of each circle is based on *p*-values (darker colours indicate more significant changes of metabolites in the corresponding pathway), whereas the size of the circle corresponds to the pathway impact score. The most impacted pathways having high statistical significance scores are annotated by their full name or numbers (see legend).

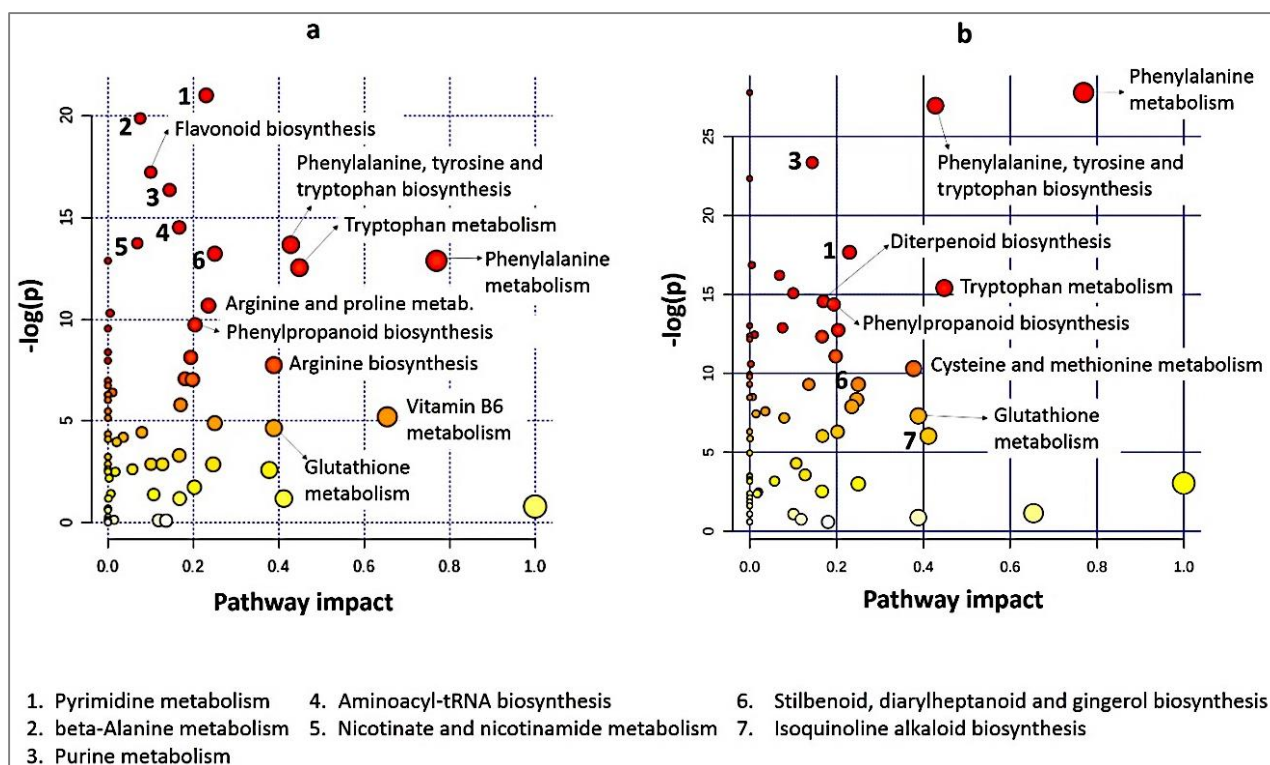

[illegible]
